# Supplementary material for: Nucleus accumbens dopamine tracks aversive stimulus duration and prediction but not value or prediction error
Source: eLife. 2022 Nov 11;11:e82711. doi: 10.7554/eLife.82711 (PMC9651945; doi:10.7554/eLife.82711)
Supplement: Source data 1. [file elife-82711-data1.xlsx]

## Sheet: Sheet1
Experiment	N	FSCV readout	Behavioral readout
Real time place aversion of randomly assigned quadrant (Fig 1A)	10		X
Real time place aversion of preferred quadrant (Fig 1B)	15		X
Approach-avoidance foraging task (Fig 1C)	12		X
Operant box WN exposures (Fig 1D)	14		X
WN and reward choice task (Fig 1F)	6		X
Aversive Pavlovian conditioning day 1
- First 30 trials (Fig 2A, B, C and E)	16	X	X
- Mix trials (Fig 3D, E and F)	11	X
Appetitive Pavlovian conditioning (Fig 2B and C)	10	X	X
Aversive Pavlovian conditioning days 2 – 6 (Fig 1E, 2B and C)	4	X	X
	13		X
Dose response (Fig 1D and 2F)	6	X	X
	13		X
Deterministic experiment (Fig 2E and G)	9	X
Probabilistic experiment (Fig 2E, 3A, B and C)	9	X
Concurrent reward & WN and extinction (Fig 2E, 3G and H)	6	X
